# Supplementary material for: Public-private partnership to rapidly strengthen and scale COVID-19 response in Western Kenya
Source: bioRxiv or medRxiv preprint supplement (doi:10.1101/2021.08.31.21262891), 2022-07-13

## Supplementary materials

### 1. Screenshots Operational Dashboard COVID-Dx

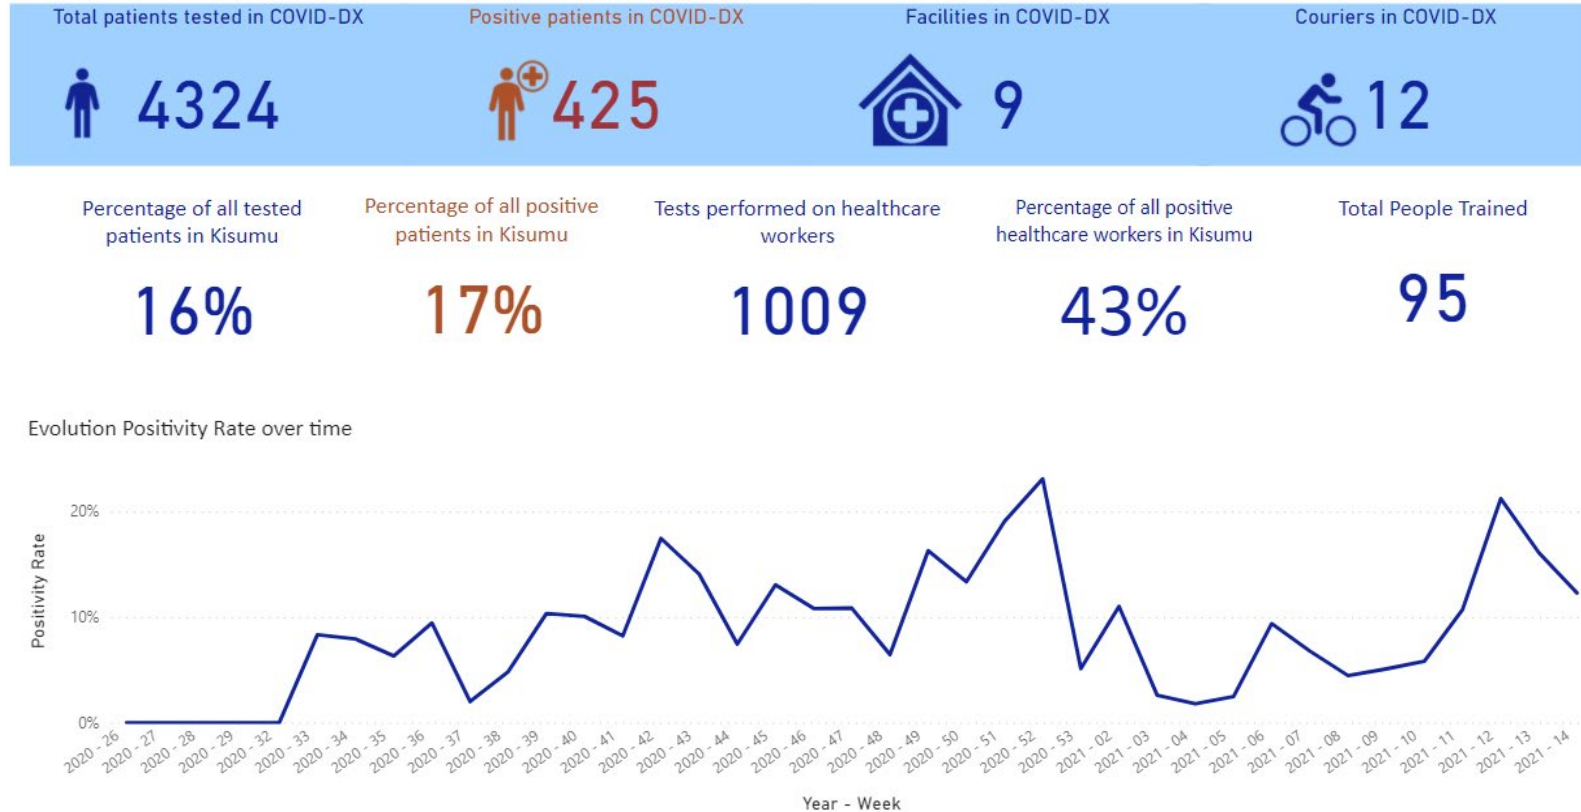

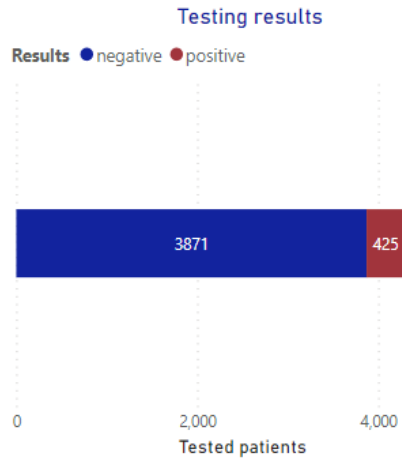

Total patients tested grouped by results.

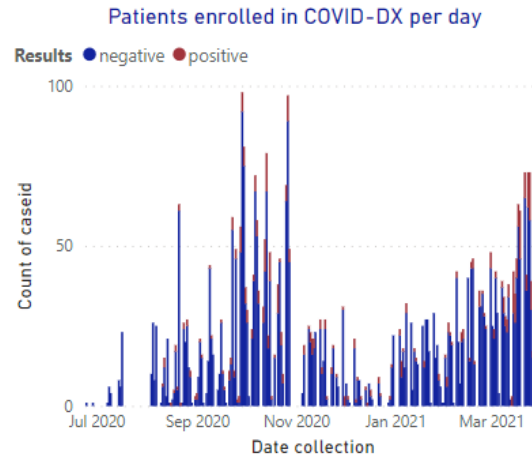

Overview of the total number of patients enrolled over time.

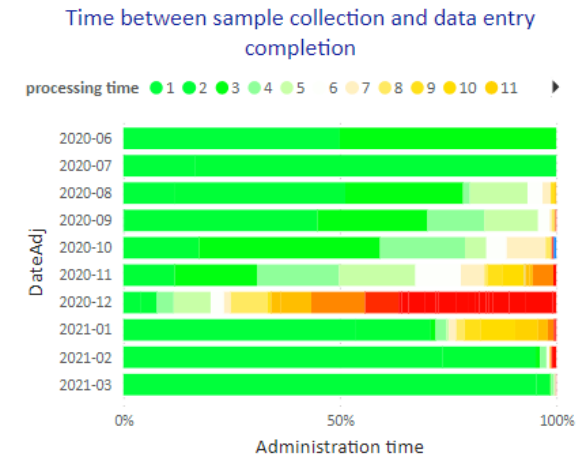

Number of days between sample collection and results reporting

Positive patients reported asymptomatic

# 23%

Frequency with which symptoms have been reported in positive cases

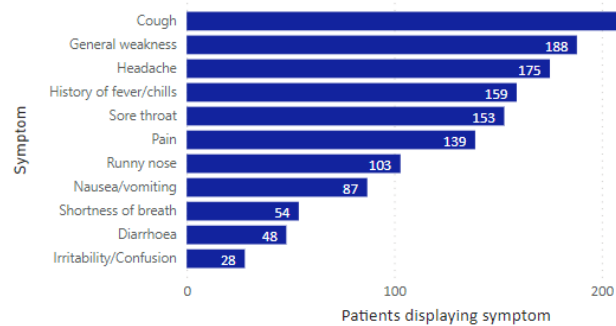

In the graph above, a patient can be represented multiple times if (s)he displayed multiple symptoms.

Underlying conditions (when applicable)

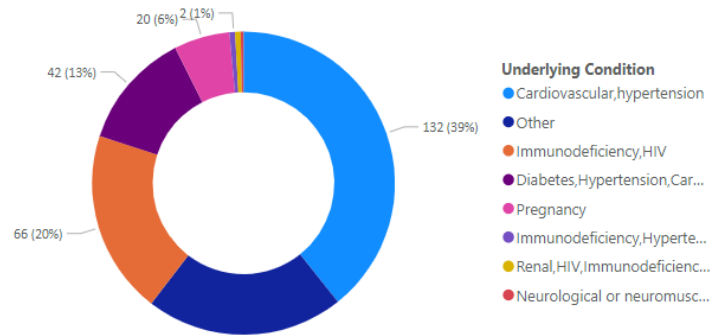

## 2. COVID-Dx roll-out in the context of Kenyan COVID pandemic highlights

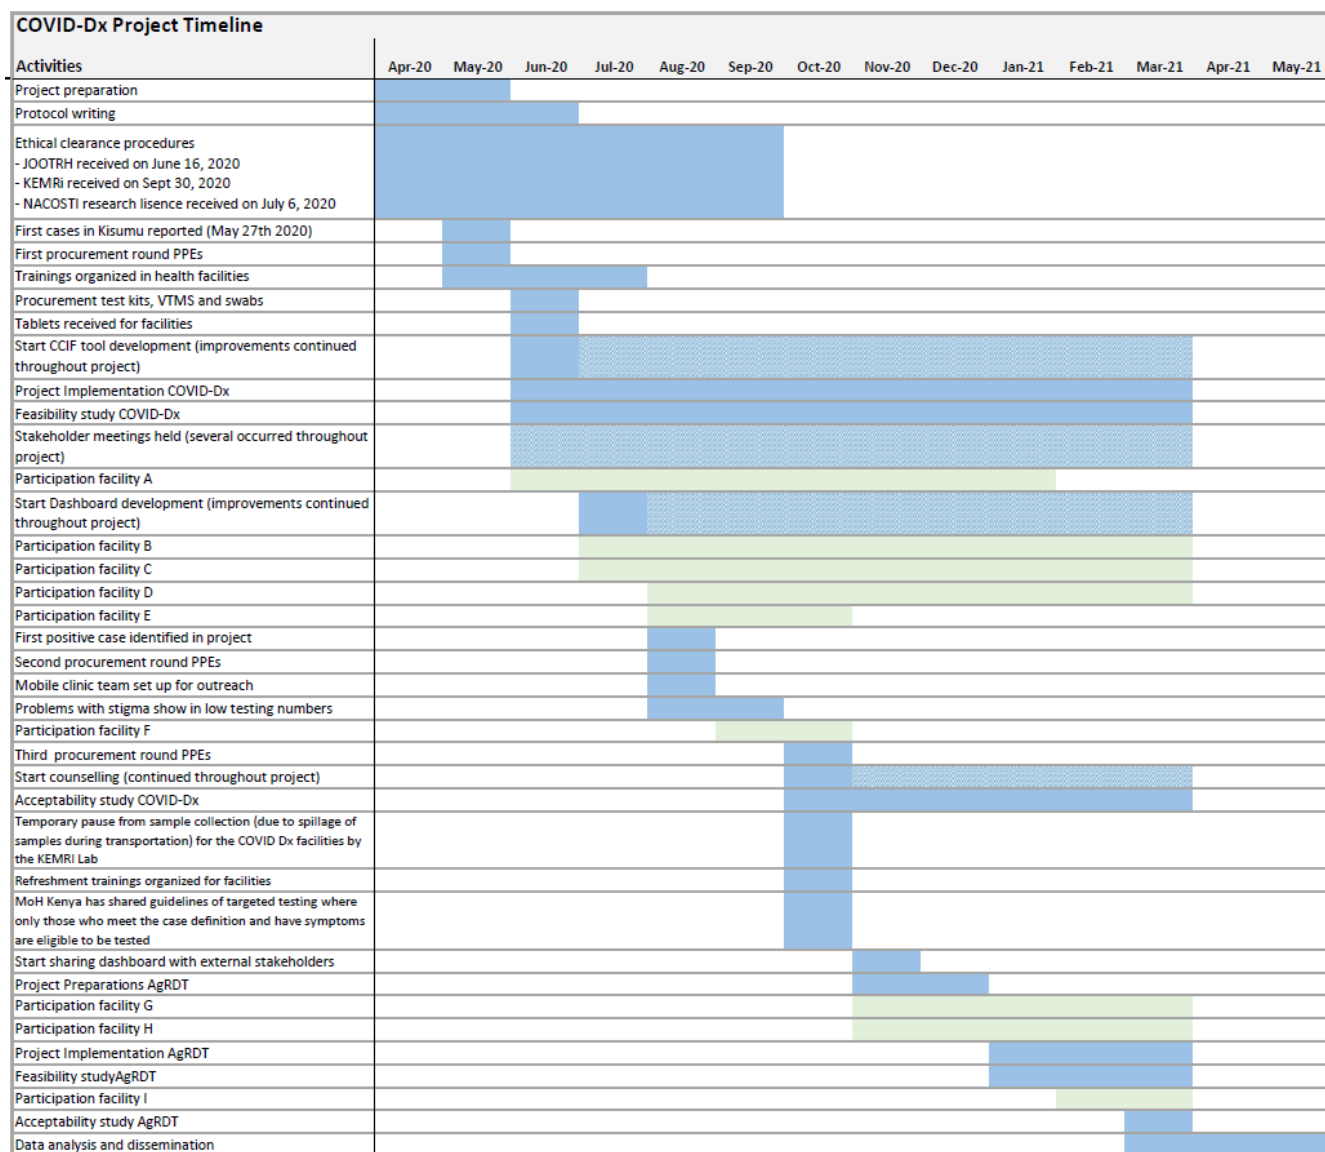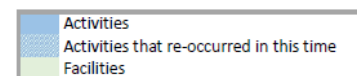

Supplement: Supplementary file [file media-1.pdf]
